# Supplementary material for: Prioritizing Therapeutics for Lung Cancer: An Integrative Meta-analysis of Cancer Gene Signatures and Chemogenomic Data
Source: PLoS Comput Biol. 2015 Mar 18;11(3):e1004068. doi: 10.1371/journal.pcbi.1004068 (PMC4364883; doi:10.1371/journal.pcbi.1004068)
Supplement: S1 Table — (XLS) [file pcbi.1004068.s001.xls]

## Sheet: 247 significant drugs
CMap drug name	Rank		247 significant drugs consistently reverse lung cancer gene changes
dexverapamil	1
quinostatin	2
celastrol	3
8-azaguanine	4
DL-thiorphan	5
0297417-0002B	6
5248896	7
trazodone	8
sanguinarine	9
triflusal	10
MS-275	11
Prestwick-559	12
blebbistatin	13
pyrvinium	14
menadione	15
medrysone	16
clomipramine	17
piperlongumine	18
sulconazole	19
repaglinide	20
1,4-chrysenequinone	21
trioxysalen	22
apigenin	23
rottlerin	24
dequalinium chloride	25
Prestwick-1084	26
meticrane	27
bepridil	28
5252917	29
gliclazide	30
norcyclobenzaprine	31
phthalylsulfathiazole	32
phenoxybenzamine	33
ifenprodil	34
milrinone	35
terfenadine	36
rimexolone	37
piperidolate	38
morantel	39
Y-27632	40
cortisone	41
calmidazolium	42
thioguanosine	43
omeprazole	44
bufexamac	45
skimmianine	46
4,5-dianilinophthalimide	47
ebselen	48
antimycin A	49
ginkgolide A	50
puromycin	51
cloperastine	52
astemizole	53
ellipticine	54
vorinostat	55
acepromazine	56
prenylamine	57
tyloxapol	58
pargyline	59
scriptaid	60
bisacodyl	61
GW-8510	62
promethazine	63
nortriptyline	64
mebendazole	65
deptropine	66
talampicillin	67
doxazosin	68
fluspirilene	69
protriptyline	70
chrysin	71
norethisterone	72
ursodeoxycholic acid	73
sulfametoxydiazine	74
ipratropium bromide	75
cetirizine	76
metyrapone	77
imipenem	78
procaine	79
mefloquine	80
daunorubicin	81
propafenone	82
natamycin	83
flunarizine	84
resveratrol	85
etomidate	86
luteolin	87
thiostrepton	88
hexestrol	89
carbachol	90
amiodarone	91
riboflavin	92
perhexiline	93
latamoxef	94
tranylcypromine	95
cycloserine	96
pimozide	97
levonorgestrel	98
alsterpaullone	99
Prestwick-860	100
methylergometrine	101
camptothecin	102
rifabutin	103
trichostatin A	104
ronidazole	105
betahistine	106
amoxicillin	107
methacholine chloride	108
phenindione	109
etacrynic acid	110
methazolamide	111
N-acetyl-L-leucine	112
bezafibrate	113
ethaverine	114
liothyronine	115
pentoxyverine	116
dipyridamole	117
etamsylate	118
propylthiouracil	119
apramycin	120
promazine	121
diltiazem	122
trifluoperazine	123
amoxapine	124
estriol	125
simvastatin	126
niclosamide	127
ketanserin	128
eucatropine	129
prochlorperazine	130
roxithromycin	131
levamisole	132
zimeldine	133
clemizole	134
beta-escin	135
0175029-0000	136
imipramine	137
ethotoin	138
clioquinol	139
bromocriptine	140
nipecotic acid	141
fluocinonide	142
thioridazine	143
cefalexin	144
lorglumide	145
Prestwick-685	146
meptazinol	147
Prestwick-665	148
nicergoline	149
cinchocaine	150
methylbenzethonium chloride	151
meclozine	152
felodipine	153
fenoprofen	154
chlorpromazine	155
loperamide	156
alpha-estradiol	157
fluphenazine	158
LY-294002	159
deferoxamine	160
acetylsalicylic acid	161
sirolimus	162
alvespimycin	163
tretinoin	164
tanespimycin	165
valproic acid	166
tyrphostin AG-825	167
cantharidin	168
difenidol	169
berberine	170
rolitetracycline	171
(-)-MK-801	172
roxarsone	173
sitosterol	174
halcinonide	175
6-azathymine	176
tobramycin	177
harmine	178
miconazole	179
hesperetin	180
hexamethonium bromide	181
Prestwick-674	182
aminohippuric acid	183
tonzonium bromide	184
chlorzoxazone	185
methylprednisolone	186
fluorometholone	187
oxetacaine	188
0173570-0000	189
meclofenoxate	190
clomifene	191
flupentixol	192
adrenosterone	193
denatonium benzoate	194
cyproterone	195
thiocolchicoside	196
famprofazone	197
flufenamic acid	198
lisinopril	199
clobetasol	200
fusaric acid	201
pyridoxine	202
vidarabine	203
alexidine	204
xylometazoline	205
oxprenolol	206
metergoline	207
flunisolide	208
5224221	209
azacitidine	210
verteporfin	211
quinisocaine	212
HC toxin	213
reserpine	214
CP-645525-01	215
proadifen	216
spiperone	217
dexpropranolol	218
trifluridine	219
oxytetracycline	220
dextromethorphan	221
0179445-0000	222
sulfafurazole	223
flunixin	224
demeclocycline	225
trimetazidine	226
remoxipride	227
atropine	228
Prestwick-664	229
corbadrine	230
suloctidil	231
colchicine	232
betaxolol	233
glibenclamide	234
pentamidine	235
doxorubicin	236
budesonide	237
pyrazinamide	238
guanfacine	239
tracazolate	240
nisoxetine	241
15-delta prostaglandin J2	242
phenazopyridine	243
cyproheptadine	244
bromperidol	245
meropenem	246
sulfamethoxypyridazine	247
