# Supplementary material for: Prioritizing Therapeutics for Lung Cancer: An Integrative Meta-analysis of Cancer Gene Signatures and Chemogenomic Data
Source: PLoS Comput Biol. 2015 Mar 18;11(3):e1004068. doi: 10.1371/journal.pcbi.1004068 (PMC4364883; doi:10.1371/journal.pcbi.1004068)
Supplement: S3 Table — (XLS) [file pcbi.1004068.s003.xls]

## Sheet: Structurally similar to TOP
Drug name		11 significant drugs are structurally similar to one or more TOP drugs
1,4-chrysenequinone		(See Figure 4)
chlorpromazine
fluphenazine
fluspirilene
ketanserin
phenindione
prochlorperazine
promazine
pyrvinium
thiocolchicoside
vidarabine
